# Supplementary material for: The global usage rate of bed nets during the last ten years: a systematic review and&nbsp;&nbsp;meta-analysis
Source: Research Square preprint supplement (doi:10.21203/rs.3.rs-90881/v1), 2020-10-16

**Supplementary legends**

Supplementary Figure 1. Global mapping of household ownership rate.

Supplementary Figure 2. Meta-analysis for bed net household owner: subgroup for bed net used.

Supplementary Figure 3. Meta-analysis for bed net individual owner: subgroup for bed net used.

Supplementary Figure 4. Global mapping of household usage rate of bed net. Supplementary Supplementary Figure 5. Meta-analysis for bed net individual owner rate: subgroup bed net used.

Supplementary Figure 6. Meta-analysis for bed net individual usage rate: subgroup bed net used.

Supplementary Figure 7. Funnel plot of standard error demonstrating publication bias.

***Supplementary Figure 1. Global mapping of household ownership rate***


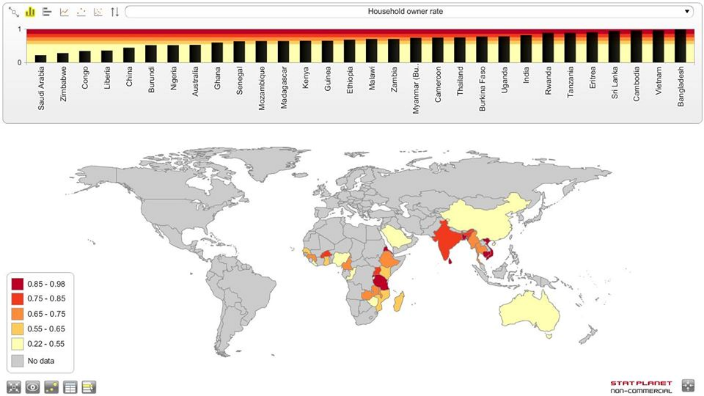


***Supplementary Figure 2. Meta-analysis for bed net household owner: subgroup for bed net used***

***
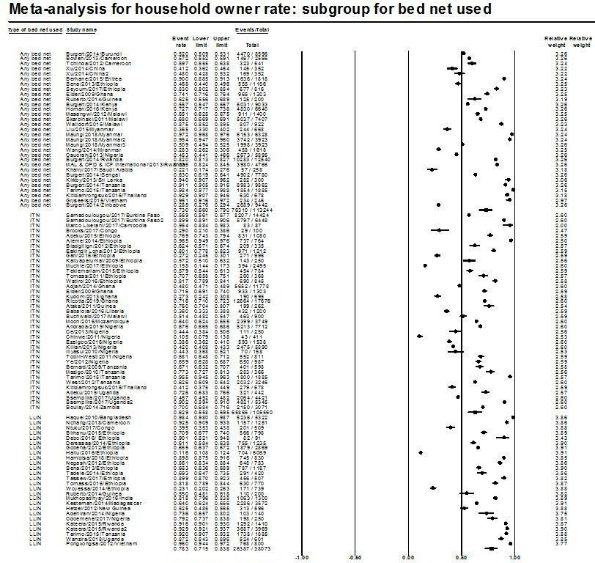
***

***Supplementary Figure 3. Meta-analysis for bed net individual owner: subgroup for bed net used***


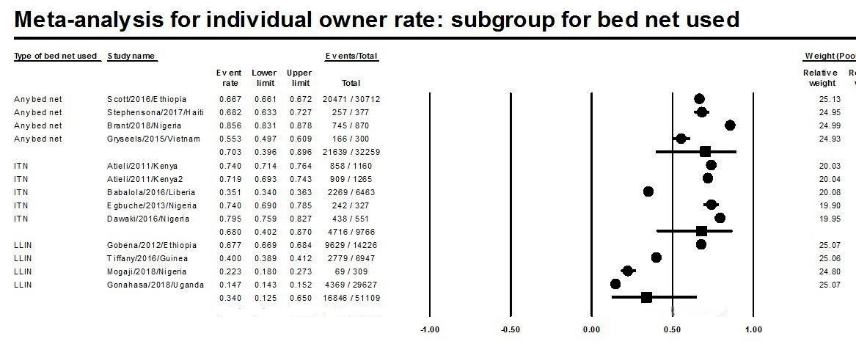


***Supplementary Figure 4. Global mapping of household usage rate of bed net***

***
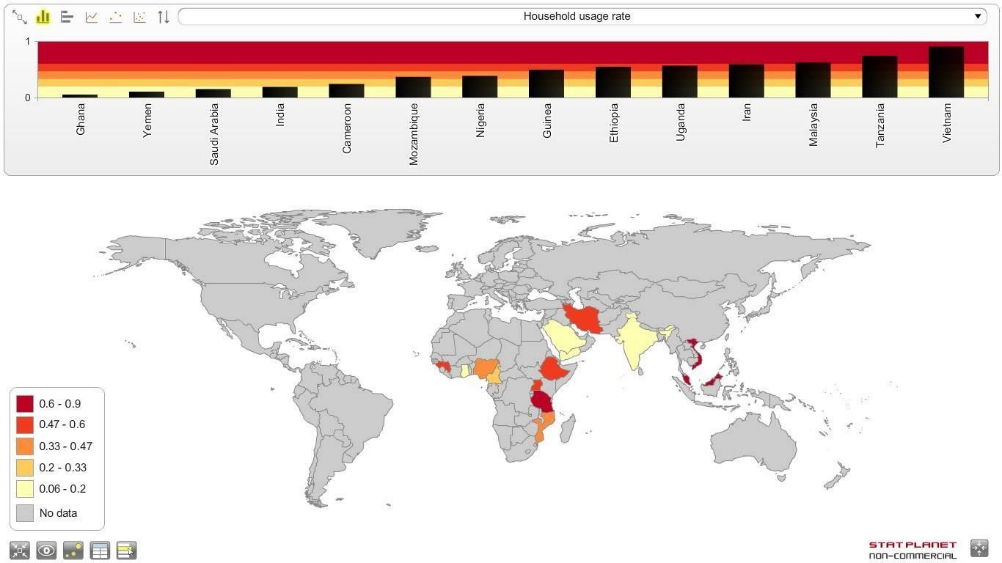
***

***Supplementary Figure 5. Meta-analysis for bed net individual owner rate: subgroup bed net used***


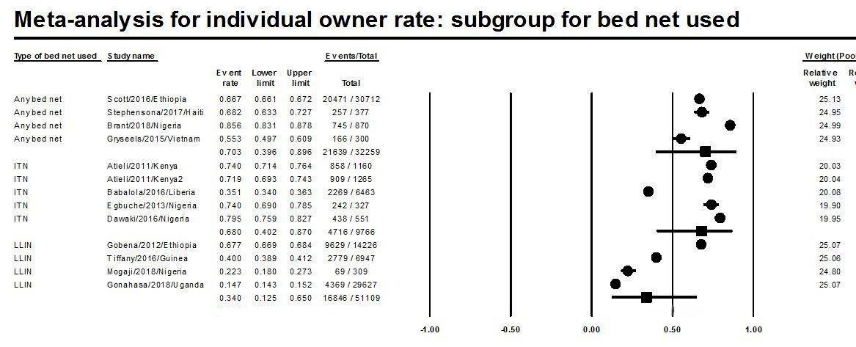


***Supplementary Figure 6. Meta-analysis for bed net individual usage rate: subgroup bed net used***

***
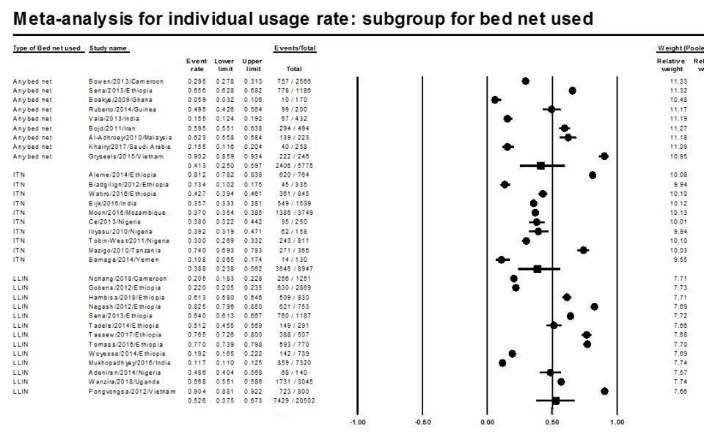
***

***Supplementary Figure 7. Funnel plot of standard error demonstrating publication bias***


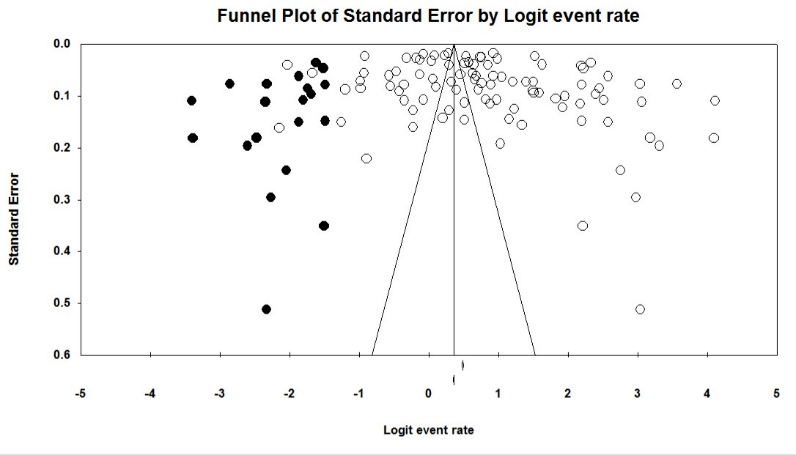

Supplement: Supplementary file 1 [file e0e01929f319e58f05133ef3.docx]
